# Supplementary material for: Ag Catalysts Supported on CeO2, MnO2 and CeMnOx Mixed Oxides for Selective Catalytic Reduction of NO by C3H6
Source: MDPI journal article supplement (doi:10.3390/nano13050873), 2023-02-26
Supplement: s1 [file s1]

Supplementary Materials

# Ag Catalysts Supported on CeO<sub>2</sub>, MnO<sub>2</sub> and CeMnO<sub>x</sub> Mixed Oxides for Selective Catalytic Reduction of NO by C<sub>3</sub>H<sub>6</sub>

Eleonora La Greca <sup>1</sup>, Tamara S. Kharlamova <sup>2</sup>, Maria V. Grabchenko <sup>2</sup>, Luca Consentino <sup>1</sup>, Daria Yu. Savenko <sup>2</sup>, Giuseppe Pantaleo <sup>1</sup>, Lidiya S. Kibis <sup>3</sup>, Olga A. Stonkus <sup>3</sup>, Olga V. Vodyankina <sup>2,\*</sup> and Leonarda Francesca Liotta <sup>1,\*</sup>

<sup>1</sup> Institute for the Study of Nanostructured Materials (ISMN), (Italian) National Research Council (CNR), Via Ugo La Malfa 153, 90146 Palermo, Italy

<sup>2</sup> Laboratory of Catalytic Research, Tomsk State University, Lenin Ave. 36, 634050 Tomsk, Russia

<sup>3</sup> Borekov Institute of Catalysis SB RAS, Lavrentiev Ave. 5, 630090 Novosibirsk, Russia

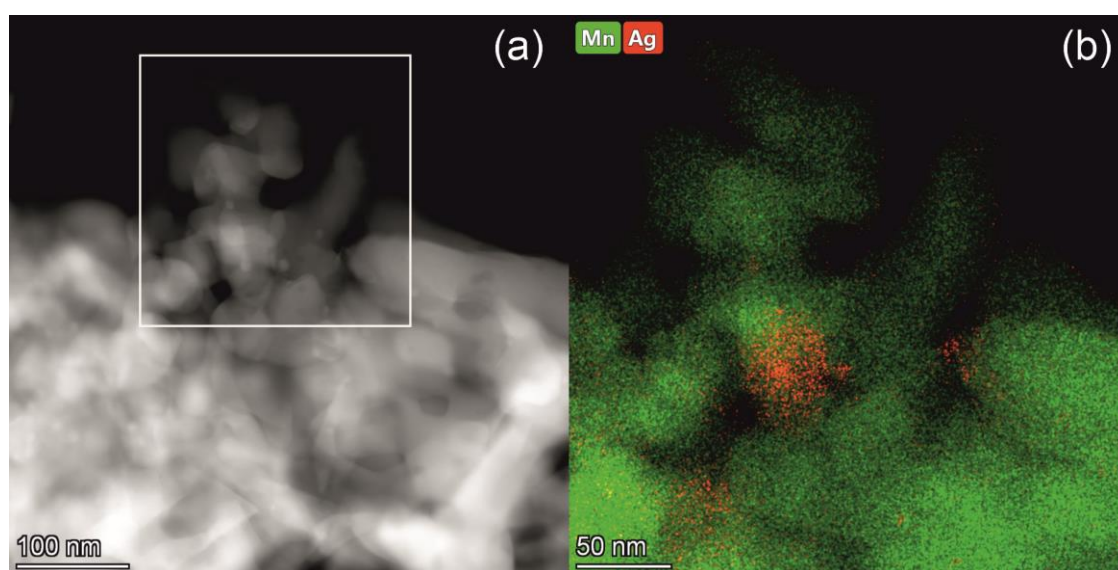

**Figure S1.** HAADF STEM (a) and high resolution EDX mapping of indicated region (b) for the Ag/MnO<sub>x</sub> sample.

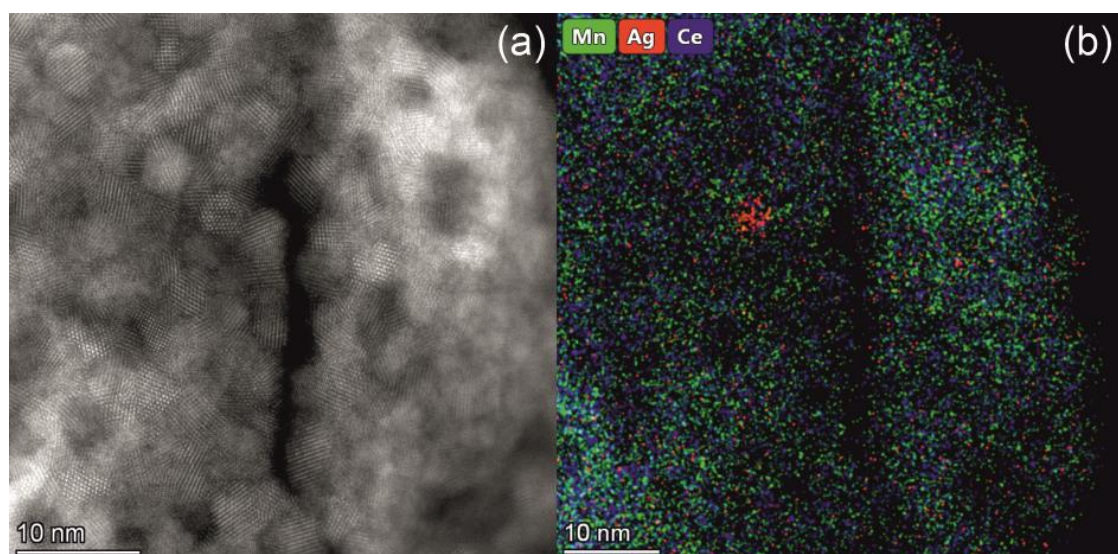

**Figure S2.** HRTEM image (a) and high resolution EDX mapping (b) for the Ag/CeMnO<sub>x</sub> sample.

### Results of Studies of Aged Samples

The results of the study of aged samples by the low-temperature adsorption method are presented in Table S1. The presented data indicate that under aging conditions, there is a strong change in the textural characteristics of the catalysts as a result of sintering. For Ag/CeO<sub>2</sub> and Ag/CeMnO<sub>x</sub> samples, a decrease in the SSA by a factor of 2 is observed, while the SSA decrease by a factor of 2 is observed for the Ag/MnO<sub>x</sub> sample.

**Table S1.** Specific surface area (SSA) and total pore volume (V) of supports and catalysts determined by low-temperature nitrogen adsorption/desorption data.

| Sample                       | SSA, m <sup>2</sup> /g | V, cm <sup>3</sup> /g |
|------------------------------|------------------------|-----------------------|
| Ag/CeO <sub>2</sub>          | 34                     | 0.13                  |
| Ag/CeO <sub>2</sub> (aged)   | 14                     | 0.12                  |
| Ag/MnO <sub>x</sub>          | 12                     | 0.12                  |
| Ag/MnO <sub>x</sub> (aged)   | 3                      | 0.01                  |
| Ag/CeMnO <sub>x</sub>        | 47                     | 0.22                  |
| Ag/CeMnO <sub>x</sub> (aged) | 21                     | 0.16                  |

Table S2 shows the phase composition of the samples and the characteristics of their crystalline phases according to XRD data. According to the XRD data, in the aged Ag/CeO<sub>2</sub> sample, only a phase with a fluorite structure is present with a crystal lattice parameter,  $a = 5.41 \text{ \AA}$ . At the same time, a noticeable increase in the size of crystallites of the fluorite phase up to 43 nm is observed for the aged Ag/CeO<sub>2</sub> sample in comparison with the initial catalysts.

For the aged Ag/MnO<sub>x</sub> sample, the formation of one cubic phase of manganese oxide Mn<sub>2</sub>O<sub>3</sub> with a crystal cell parameter of  $9.40 \text{ \AA}$  and a crystallite size of ~97 nm is observed.

In the aged Ag/CeMnO<sub>x</sub> sample, according to the XRD data, there are two crystalline phases: a relatively finely dispersed CeO<sub>2</sub> phase with a fluorite structure and a rough phase of manganese oxide Mn<sub>2</sub>O<sub>3</sub>.

**Table S2.** Phase composition of aged samples and characteristics of their crystalline phases according to XRD data.

| Sample                       | Phase composition              |                | Structural parameters |                    | D <sub>XRD</sub> , nm |
|------------------------------|--------------------------------|----------------|-----------------------|--------------------|-----------------------|
|                              | Phase                          | Content, wt. % | S.G.                  | $a$ , $\text{\AA}$ |                       |
| Ag/CeO <sub>2</sub> (aged)   | fluorite                       | 100            | Fm-3m                 | 5.41               | 43                    |
| Ag/MnO <sub>x</sub> (aged)   | Mn <sub>2</sub> O <sub>3</sub> | 100            | Ia-3                  | 9.40               | 97                    |
| Ag/CeMnO <sub>x</sub> (aged) | fluorite                       | 72             | Fm-3m                 | 5.40               | 13                    |
|                              | Mn <sub>2</sub> O <sub>3</sub> | 28             | Ia-3                  | 9.40               | n.a.*                 |

\*The correct determination of a full width at half maximum is impossible.
